# Supplementary material
Source: PubMed Central journal article supplement (PMC5755965)
Supplement: NIHMS925312-supplement-supplement_1.pdf [file NIHMS925312-supplement-supplement_1.pdf]

**Supplementary Table 1.** Bivariate associations of number of doses received with post-tussive vomiting and severe disease, stratified by age group

| Number of pertussis-containing doses | Post-tussive vomiting |            |             |                  | p-value |
|--------------------------------------|-----------------------|------------|-------------|------------------|---------|
|                                      | Total                 | N (%)      | OR          | 95% CI           |         |
| <b>3-4 months</b>                    |                       |            |             |                  |         |
| 0                                    | 28                    | 17 (60.7)  | 1.04        | 0.45-2.40        | 0.70    |
| 1                                    | 127                   | 76 (59.8)  | Ref         |                  |         |
| 2                                    | 17                    | 12 (70.6)  | 1.61        | 0.54-4.85        |         |
| <b>5-6 months</b>                    |                       |            |             |                  |         |
| 0                                    | 14                    | 8 (57.1)   | 1.14        | 0.35-3.66        | 0.94    |
| 1                                    | 21                    | 13 (61.9)  | 1.39        | 0.51-3.81        |         |
| 2                                    | 63                    | 34 (54.0)  | Ref         |                  |         |
| 3                                    | 9                     | 5 (55.6)   | 1.07        | 0.26-4.35        |         |
| <b>7-18 months</b>                   |                       |            |             |                  |         |
| 0                                    | 70                    | 50 (71.4)  | 1.28        | 0.71-2.30        | 0.12    |
| 1                                    | 15                    | 8 (53.3)   | 0.58        | 0.20-1.67        |         |
| 2                                    | 27                    | 20 (74.1)  | 1.46        | 0.59-3.60        |         |
| 3                                    | 225                   | 149 (66.2) | Ref         |                  |         |
| 4                                    | 8                     | 2 (25.0)   | 0.17        | 0.03-0.86        |         |
| <b>19 months – 6 years</b>           |                       |            |             |                  |         |
| 0                                    | 232                   | 154 (66.4) | <b>2.50</b> | <b>1.79-3.50</b> | <0.0001 |
| 1                                    | 41                    | 25 (61.0)  | <b>1.98</b> | <b>1.03-3.82</b> |         |
| 2                                    | 30                    | 18 (60.0)  | 1.90        | 0.89-4.05        |         |
| 3                                    | 108                   | 65 (60.2)  | <b>1.92</b> | <b>1.24-2.95</b> |         |
| 4                                    | 720                   | 447 (62.1) | <b>2.07</b> | <b>1.62-2.65</b> |         |
| 5                                    | 408                   | 180 (44.1) | Ref         |                  |         |
| <b>7-12 years</b>                    |                       |            |             |                  |         |
| 0                                    | 181                   | 98 (54.1)  | <b>1.65</b> | <b>1.22-2.24</b> | 0.0013  |
| 1                                    | 88                    | 38 (43.2)  | 1.06        | 0.69-1.63        |         |
| 2                                    | 33                    | 11 (33.3)  | 0.70        | 0.34-1.45        |         |
| 3                                    | 50                    | 21 (42.0)  | 1.01        | 0.57-1.78        |         |
| 4                                    | 202                   | 107 (53.0) | <b>1.57</b> | <b>1.18-2.10</b> |         |
| 5                                    | 2255                  | 941 (41.7) | Ref         |                  |         |
| 6                                    | 362                   | 142 (39.2) | 0.90        | 0.72-1.13        |         |
| <b>13-19 years</b>                   |                       |            |             |                  |         |
| 0                                    | 69                    | 28 (40.6)  | 1.21        | 0.74-1.98        | 0.0099  |
| 1                                    | 123                   | 55 (44.7)  | 1.43        | 0.99-2.08        |         |
| 2                                    | 43                    | 15 (34.9)  | 0.95        | 0.50-1.79        |         |
| 3                                    | 32                    | 11 (34.4)  | 0.93        | 0.44-1.94        |         |
| 4                                    | 59                    | 29 (49.2)  | <b>1.71</b> | <b>1.01-2.88</b> |         |
| 5                                    | 309                   | 144 (46.6) | <b>1.54</b> | <b>1.20-1.98</b> |         |
| 6                                    | 1320                  | 477 (36.1) | Ref         |                  |         |
